# Supplementary material for: Cell-to-Medium Concentration Ratio Overshoot in the Uptake of Statins by Human Hepatocytes in Suspension, but Not in Monolayer: Kinetic Analysis Suggesting a Partial Loss of Functional OATP1Bs
Source: PubMed Central journal article supplement (PMC7561564; doi:10.1208/s12248-020-00512-6), 2020-10-15

Figure S1

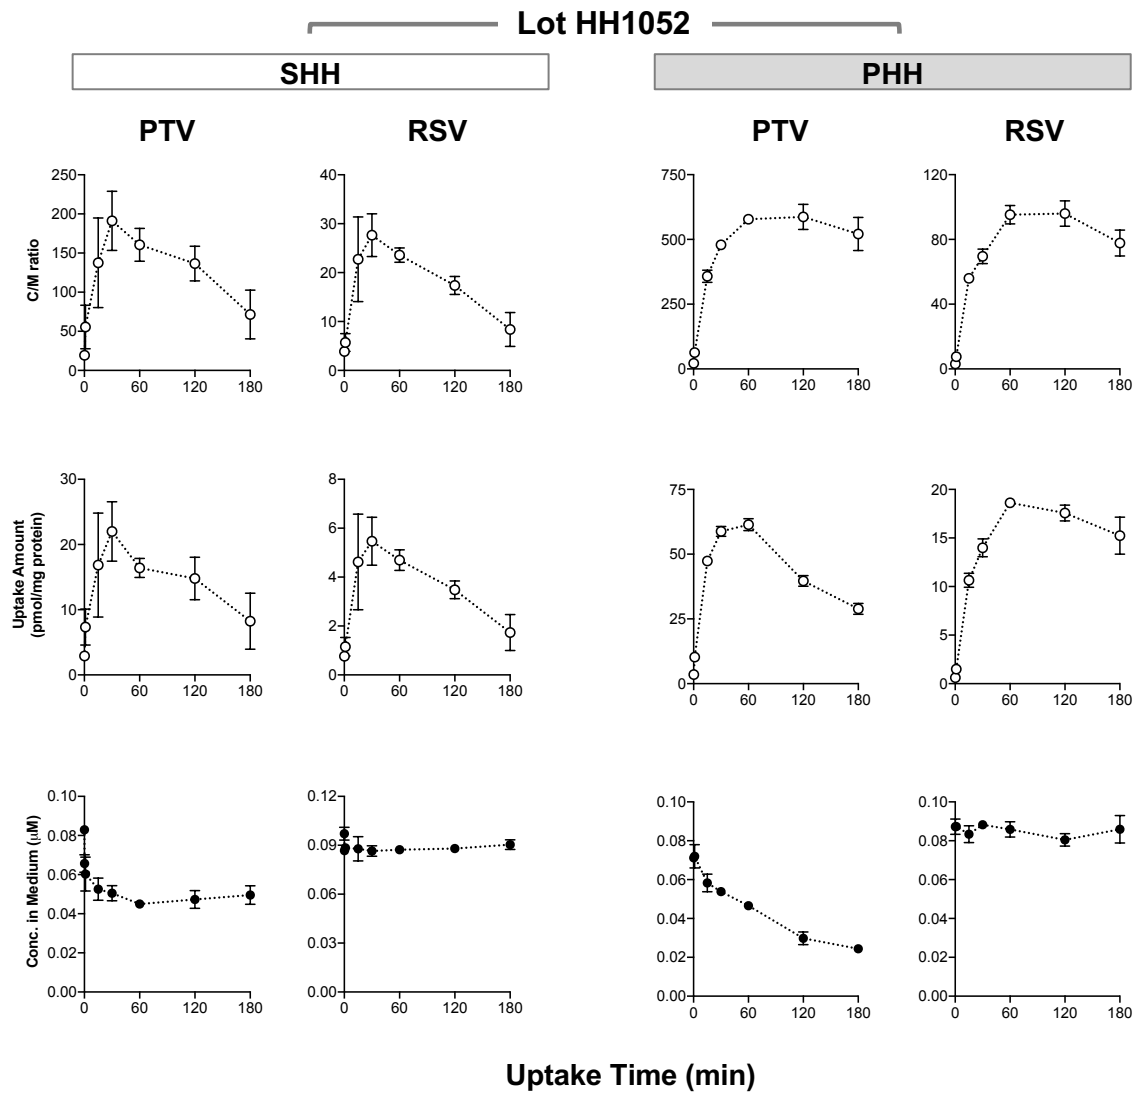

Figure S2

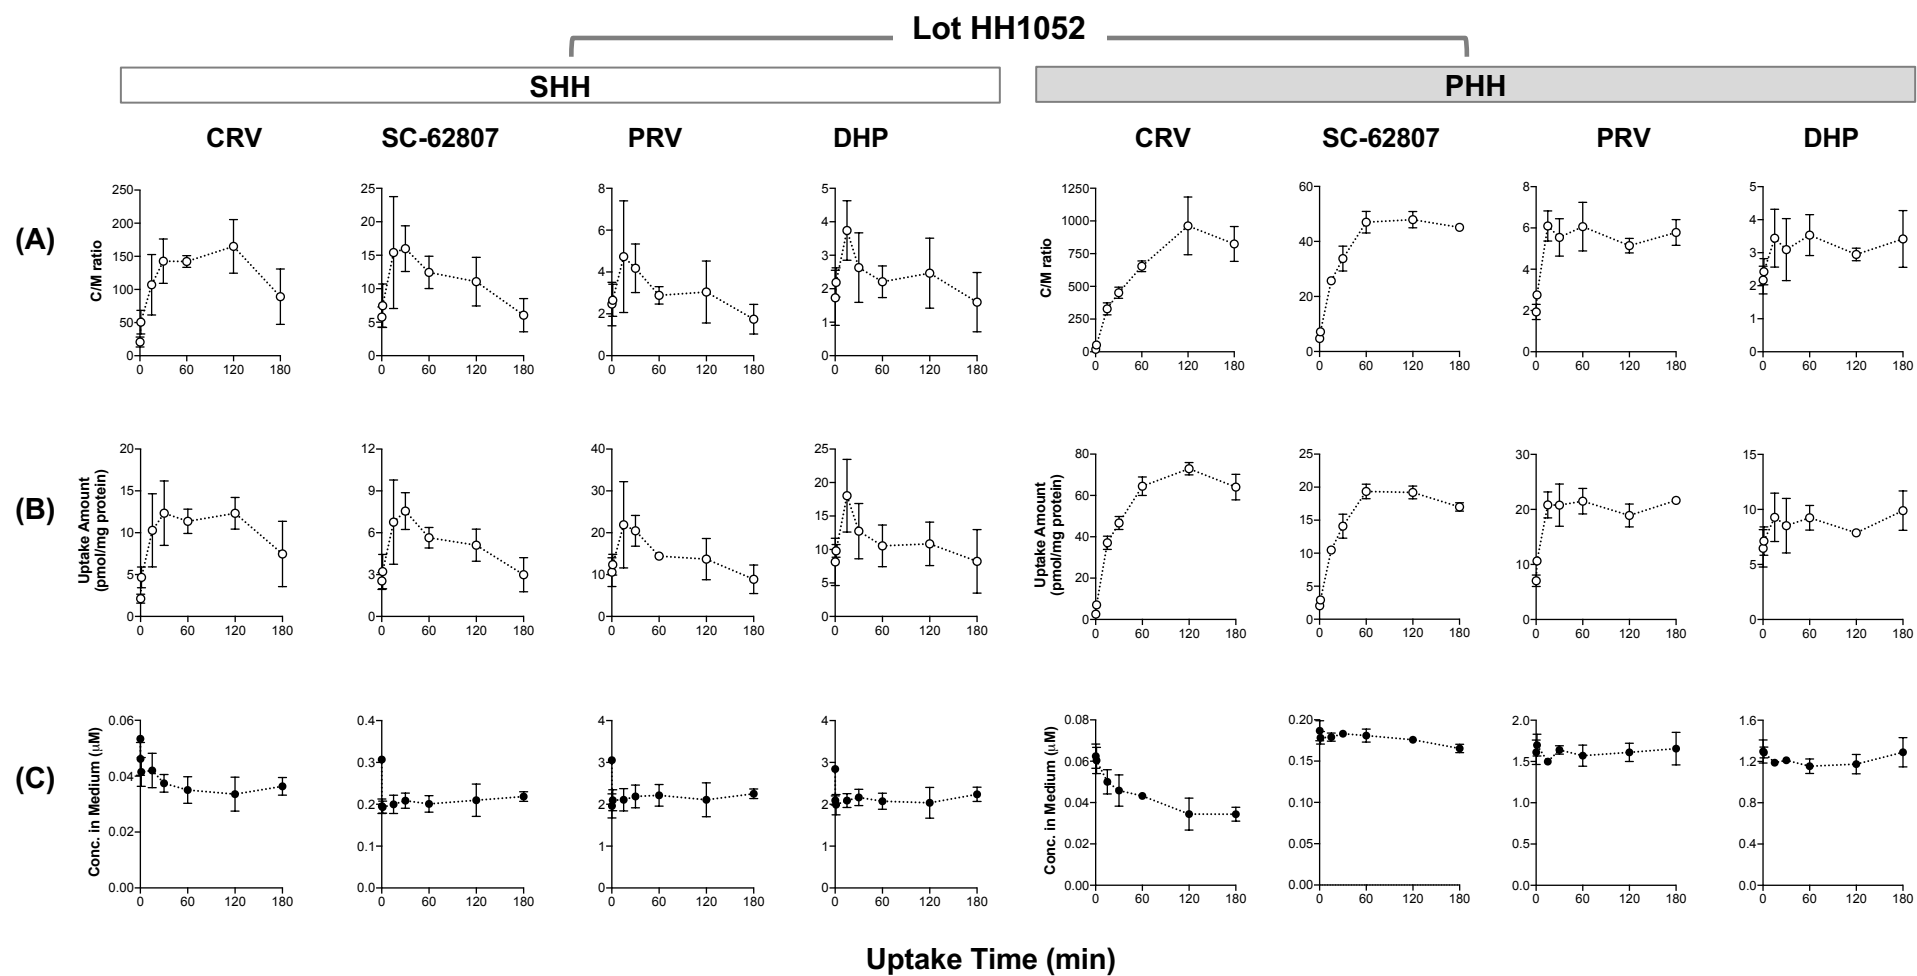

Figure S3

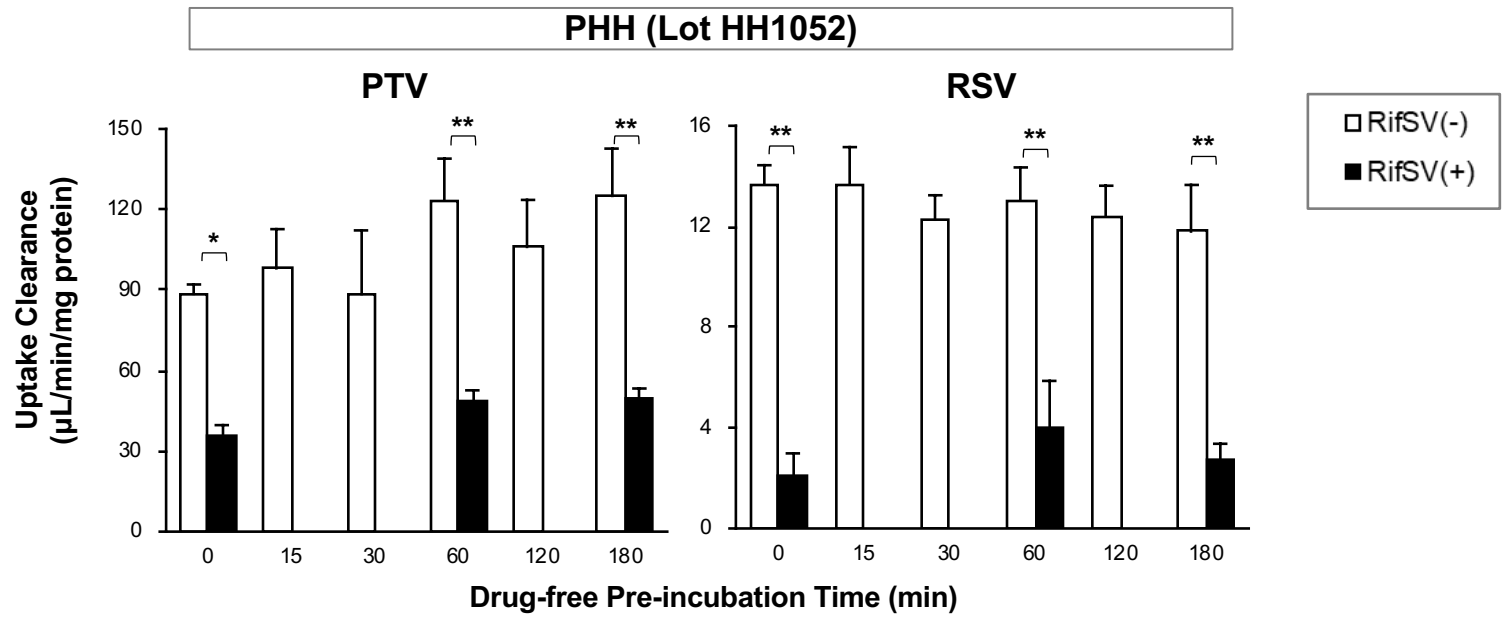

Supplement: 12248_2020_512_MOESM1_ESM.pdf [file 12248_2020_512_MOESM1_ESM.pdf]
